# Supplementary material for: Role of Ca2+/Calmodulin-Dependent Protein Kinase Type II in Mediating Function and Dysfunction at Glutamatergic Synapses
Source: PubMed Central journal article supplement (PMC9252440; doi:10.3389/fnmol.2022.855752), 2022-06-20
Supplement: Table_1.pdf [file Table_1.pdf]

**Supplementary Table 1: Synaptic substrates of CaMKII**

| Sl. No. | Name of the substrate                      | CaMKII phosphorylation site(s)                                                                  | Functional relevance                                                  | Reference                                    |
|---------|--------------------------------------------|-------------------------------------------------------------------------------------------------|-----------------------------------------------------------------------|----------------------------------------------|
| 1       | CaMKII                                     | Thr <sup>286/287</sup>                                                                          | LTP                                                                   | Lisman and Zhabotinsky, 2001                 |
| 2       | CaMKII                                     | Thr <sup>305/306</sup>                                                                          | Inhibits CaMKII function                                              | Vest et al., 2007                            |
| 3       | NMDAR subunit GluN2B                       | Ser <sup>1303</sup>                                                                             | Regulates the interaction with CaMKII                                 | McGlade-McCulloh et al., 1993                |
| 4       | NMDAR subunit GluN2A                       | Ser <sup>1291</sup>                                                                             | NMDAR current potentiation                                            | Chen et al., 2007                            |
| 5       | AMPA subunit GluA1                         | Ser <sup>831</sup>                                                                              | Enhances AMPA channel conductance; LTP                                | Derkach et al., 1999                         |
| 6       | PSD95; PDZ1 domain                         | Ser <sup>73</sup>                                                                               | Facilitates dissociation of GluN2A from PSD95                         | Gardoni et al., 2006                         |
| 7       | Synapse-associated protein (SAP) 97        | Ser <sup>39</sup>                                                                               | GluA1 redistribution in AMPAR, SAP97 trafficking to spines            | Mauceri et al., 2004                         |
| 8       | SAP97                                      | Ser <sup>232</sup>                                                                              | Modulates binding of other proteins, Disrupts interaction with GluN2A | Gardoni et al., 2003; Nikandrova et al, 2010 |
| 9       | TARP $\gamma$ -8                           | Ser <sup>277</sup> , Ser <sup>281</sup>                                                         | Role in synaptic plasticity; Enhances synaptic insertion of AMPAR     | Park et al., 2016                            |
| 10      | Arc                                        | Ser <sup>260</sup>                                                                              | Regulates oligomerization of Arc; Synaptic plasticity                 | Zhang et al., 2019                           |
| 11      | Guanylate kinase-associated protein (GKAP) | Ser <sup>54</sup>                                                                               | Induces poly ubiquitination of GKAP                                   | Shin et al., 2012                            |
| 12      | Densin-180                                 | Ser <sup>94</sup> , Ser <sup>134</sup>                                                          | Regulates binding with other proteins in PSD95                        | Strack et al., 2000b                         |
| 13      | SynGAP synaptic Ras/Rap                    | Ser <sup>1123</sup> , Ser <sup>750/751/756</sup> , Ser <sup>764/765</sup> , Ser <sup>1058</sup> | Increases RasGTPase activity                                          | Oh et al., 2004                              |

|    |                              |                                                               |                                                                                |                       |
|----|------------------------------|---------------------------------------------------------------|--------------------------------------------------------------------------------|-----------------------|
|    | GTPase-activating protein    |                                                               |                                                                                |                       |
| 14 | Vimentin                     | Ser <sup>82</sup>                                             | Synaptic reorganization                                                        | Inagaki et al., 1997  |
| 15 | Stargazin (TARP $\gamma$ -2) | Ser <sup>9</sup>                                              | Stops the diffusion of surface AMPARs at synaptic sites; Promotes AMPAfication | Opazo et al., 2010    |
| 16 | Nav1.6                       | Ser <sup>561</sup> and Ser <sup>641</sup> /Thr <sup>642</sup> | Allows Na <sup>+</sup> influx and helps in neuronal excitability               | Zybura et al., 2020   |
| 17 | AKAP79/150                   | Thr <sup>87</sup> , Ser <sup>92</sup>                         | Spine shrinkage; LTD                                                           | Woolfrey et al., 2018 |
| 18 | Kalirin 7                    | Thr <sup>95</sup>                                             | Activation of PKA; AMPAfication; Spine enlargement                             | Xie et al., 2007      |
