# Supplementary material for: Role of Ca2+/Calmodulin-Dependent Protein Kinase Type II in Mediating Function and Dysfunction at Glutamatergic Synapses
Source: PubMed Central journal article supplement (PMC9252440; doi:10.3389/fnmol.2022.855752), 2022-06-20
Supplement: Table_2.pdf [file Table_2.pdf]

**Supplementary Table 2: Summary of CaMKII variants reported in human diseases**

| <b>CAMK2 Gene (CaMKII protein isoform)</b> | <b>Identified variant</b>                                                  |                               |                             | <b>Functional implication(s)</b>                                                                                                                                 | <b>Clinical manifestation (s)</b> | <b>Reference(s)</b>                                               |
|--------------------------------------------|----------------------------------------------------------------------------|-------------------------------|-----------------------------|------------------------------------------------------------------------------------------------------------------------------------------------------------------|-----------------------------------|-------------------------------------------------------------------|
|                                            | <b>Genomic DNA (SNP)<sup>a</sup></b>                                       | <b>Coding DNA<sup>b</sup></b> | <b>Protein<sup>c</sup></b>  |                                                                                                                                                                  |                                   |                                                                   |
| <b>CAMK2A (CaMKII<math>\alpha</math>)</b>  | g.149669166C>T                                                             | c.23G>A                       | p.(Arg8His)                 | ↓ pT <sup>286</sup> ;<br>↓ Ca <sup>2+</sup> /CaM-stimulated activity                                                                                             | SCZ                               | Brown et al., 2021                                                |
|                                            | g.150281027T>A<br>or<br>g.150281027T>C<br>or<br>g.150281027T>G (rs6881743) | --                            | --                          | Intron variant                                                                                                                                                   | AD                                | Fang et al., 2019                                                 |
|                                            | g.150276863C>T (rs10515639)                                                | --                            | --                          | Intron variant                                                                                                                                                   | AD                                | Fang et al., 2019                                                 |
|                                            | g.149652720del                                                             | c.65del                       | p.(Gly22Glufs*10)           | Truncated, non-functional protein                                                                                                                                | Moderate ID                       | Küry et al., 2017                                                 |
|                                            | g.150261592G>A (rs3822606)                                                 | --                            | --                          | Intron variant                                                                                                                                                   | AD/MCI                            | Bufill et al., 2015                                               |
|                                            | g.150258797G>A (rs4958445)                                                 | --                            | --                          | Intron variant                                                                                                                                                   | AD                                | Fang et al., 2019                                                 |
|                                            | g.149636374A>G                                                             | c.293T>C                      | p.(Phe98Ser)                | ↓ pT <sup>286</sup> ;<br>↓ neuronal migration                                                                                                                    | Moderate ID                       | Küry et al., 2017                                                 |
|                                            | g.149636340C>G                                                             | c.327G>C                      | p.(Glu109Asp)               | ↑ pT <sup>286</sup> ;<br>↓ neuronal migration                                                                                                                    | Severe ID, DD                     | Küry et al., 2017; Study, 2017                                    |
|                                            | g.149636332G>A                                                             | c.335C>T                      | p.(Ala112Val)               | --                                                                                                                                                               | Severe ID                         | Küry et al., 2017                                                 |
|                                            | g.149633109G>C                                                             | c.412C>G                      | p.(Pro138Ala)               | No effect observed                                                                                                                                               | DD                                | Küry et al., 2017; Study, 2017                                    |
|                                            | g.149631595T>A                                                             | c.548A>T                      | p.(Glu183Val)               | Unstable protein;<br>↓ pT <sup>286</sup> ;<br>↓ neuronal migration;<br>↓ spine density; ↑ dendritic arborization; disruption of excitatory synaptic transmission | ASD, mild ID                      | Iossifov et al., 2014; Küry et al., 2017; Stephenson et al., 2017 |
|                                            | g.149631543dup                                                             | c.598+2dup                    | Skipping of in-frame exon 8 | Partial loss of catalytic domain                                                                                                                                 | ASD, severe ID                    | Iossifov et al., 2014; Küry et al., 2017                          |
|                                            | g.149631371G>A                                                             | c.635C>T                      | p.(Pro212Leu)               | Uncertain                                                                                                                                                        | Mild to severe ID                 | Küry et al., 2017                                                 |

|  |                                                       |             |                                  |                                                                                   |                                          |                                        |
|--|-------------------------------------------------------|-------------|----------------------------------|-----------------------------------------------------------------------------------|------------------------------------------|----------------------------------------|
|  | g.149631371G>T                                        | c.635C>A    | p.(Pro212Gln)                    | Disruption of catalytic-autoregulatory domain interaction;<br>↑ pT <sup>286</sup> | NDD, seizures                            | Akita et al., 2018                     |
|  | g.149630365C>T                                        | c.702G>A    | Silent variant                   | --                                                                                | DD                                       | Study, 2017                            |
|  | g.149630363G>A                                        | c.704C>T    | p.(Pro235Leu)                    | Disruption of catalytic-autoregulatory domain interaction                         | Mild ID, NDD, seizures                   | Küry et al., 2017; Akita et al., 2018  |
|  | g.149629873C>T                                        | c.817-1G>A  | p.His273_Lys300del               | Loss of autoinhibitory domain                                                     | Severe ID, NDD, seizures                 | Küry et al., 2017; Akita et al., 2018  |
|  | g.149629844T>C                                        | c.845A>G    | p.(His282Arg)                    | Unstable protein,<br>↑ pT <sup>286</sup> ;<br>↓ neuronal migration                | Severe ID                                | Küry et al., 2017                      |
|  | g.149629833T>G                                        | c.856A>C    | p.(Thr286Pro)                    | No pT <sup>286</sup> ;<br>Blockage of neuronal migration                          | Severe ID                                | Küry et al., 2017                      |
|  | g.150249081C>T<br>or<br>g.150249081C>G<br>(rs3756577) | --          | --                               | Intron variant                                                                    | AD/MCI                                   | Bufill et al., 2015; Fang et al., 2019 |
|  | g.150239936G>A<br>or<br>g.15029936G>C<br>(rs3797617)  | --          | --                               | Intron variant                                                                    | AD                                       | Fang et al., 2019                      |
|  | g.150237156G>A<br>or<br>g.150237156G>C<br>(rs6869634) | --          | --                               | Intron variant                                                                    | AD                                       | Fang et al., 2019                      |
|  | g.14960773G>A                                         | c.1186C>T   | p.(Arg396*)                      | ↓ holoenzyme assembly;<br>↓ pT <sup>286</sup> ;<br>↓ GluN2B binding               | SCZ                                      | Brown et al., 2021                     |
|  | g.149607754C>T                                        | c.1204+1G>A | Skipping of out-of-frame exon 17 | Replacement of association domain by a 178 aa long tail                           | Mild ID, DD                              | Küry et al., 2017; Study, 2017         |
|  | g.150227185T>C<br>(rs10051644)                        | --          | --                               | Intron variant                                                                    | AD                                       | Fang et al., 2019                      |
|  | g.149602688G>A                                        | c.1297C>T   | p.(Arg433Cys)                    | No effect observed                                                                | SCZ                                      | Brown et al., 2021                     |
|  | g.149602589G>A                                        | c.1429C>T   | p.(His477Tyr)                    | Disrupts self-oligomerization and holoenzyme assembly                             | Severe ID, seizures, developmental delay | Chia et al., 2018                      |

|                                     |                |               |                              |                                                                                                                                                                      |                                                    |                                                                        |
|-------------------------------------|----------------|---------------|------------------------------|----------------------------------------------------------------------------------------------------------------------------------------------------------------------|----------------------------------------------------|------------------------------------------------------------------------|
|                                     | g.149602555G>T | c.1430C>A     | p.(Pro477His)                | No effect observed                                                                                                                                                   | SCZ                                                | Brown et al., 2021                                                     |
| <i>CAMK2B</i><br>(CaMKII $\beta$ )  | g.44323805G>A  | c.85C>T       | p.(Arg29*)                   | Truncated and non-functional protein                                                                                                                                 | Mild ID, seizures, global neurodevelopmental delay | Küry et al., 2017; Heiman et al., 2018                                 |
|                                     | g.44294154C>T  | c.328G>A      | p.(Glu110Lys)                | Unstable protein;<br>$\uparrow$ pT <sup>287</sup> ;<br>$\downarrow$ neuronal migration                                                                               | Mild ID                                            | Küry et al., 2017                                                      |
|                                     | g.44283125G>A  | c.416C>T      | p.(Pro139Leu)                | Unstable protein;<br>$\uparrow$ pT <sup>287</sup> ;<br>$\downarrow$ neuronal migration                                                                               | Severe ID, DD, epilepsy, cerebellar atrophy        | Küry et al., 2017; Study, 2017; Rizzi et al., 2020; Iwama et al., 2019 |
|                                     | g.44282257C>A  | c.602-4G>T    | Splice region variant        | --                                                                                                                                                                   | DD                                                 | Study, 2017                                                            |
|                                     | g.44282217G>A  | c.638C>T      | p.(Pro213Leu)                | Disrupt catalytic-autoregulatory domain interaction                                                                                                                  | NDD, cerebellar atrophy                            | Akita et al., 2018                                                     |
|                                     | g.44282206C>T  | c.649G>A      | p.(Glu217Lys)                | --                                                                                                                                                                   | Unaffected                                         | Iossifov et al., 2014                                                  |
|                                     | g.44281927C>T  | c.709G>A      | p.(Glu237Lys)                | $\uparrow$ pT <sup>287</sup> ;<br>$\downarrow$ neuronal migration                                                                                                    | Severe ID, DD                                      | Küry et al., 2017; Study, 2017                                         |
|                                     | g.44281383C>T  | c.820-1G>A    | Skipping of in-frame exon 11 | Loss of autoinhibitory domain                                                                                                                                        | Severe ID                                          | Küry et al., 2017                                                      |
|                                     | g.44281350T>A  | c.852A>T      | p.(Arg284Ser)                | Disrupt interaction between catalytic-autoregulatory domains                                                                                                         | NDD, cerebellar atrophy                            | Akita et al., 2018                                                     |
|                                     | g.44281301T>C  | c.901A>G      | p.(Lys301Glu)                | No pT <sup>287</sup>                                                                                                                                                 | Severe ID                                          | Küry et al., 2017                                                      |
|                                     | g.44281298C>T  | c.903+1G>A    | Skipping of in-frame exon 11 | Loss of autoinhibitory domain                                                                                                                                        | Mild to severe ID                                  | Küry et al., 2017                                                      |
| g.44266243G>T                       | c.1469C>A      | p.(Ser490Tyr) | --                           | DD                                                                                                                                                                   | Study, 2017                                        |                                                                        |
| <i>CAMK2G</i><br>(CaMKII $\gamma$ ) | g.75602244C>G  | c.875G>C      | p.(Arg292Pro)                | Unstable protein;<br>$\uparrow$ pT <sup>287</sup> ;<br>$\downarrow$ neuronal migration;<br>$\downarrow$ neurite length;<br>$\downarrow$ CaM trapping;<br>affects LTM | Severe ID, severe hypotonia, facial dysmorphism    | De Ligt et al., 2012; Proietti Onori et al., 2018; Cohen et al., 2018  |
|                                     | g.75587858C>T  | c.1075G>A     | p.(Val359Met)                | --                                                                                                                                                                   | DD                                                 | Study, 2017                                                            |

<sup>a</sup>Reference genome used is NC\_000005.9 (Iossifov et al., 2014; Küry et al., 2017; Study, 2017; Akita et al., 2018; Chia et al., 2018; Brown et al., 2021), NC\_000005.10 (Bufill et al., 2015; Fang et al., 2019) for *CAMK2A*,

NC\_000007.13 (Iossifov et al., 2014; Küry et al., 2017; Study, 2017; Akita et al., 2018) for *CAMK2B* and NC\_000010.10 (De Ligt et al., 2012; Study, 2017) for *CAMK2G*

<sup>b</sup>Transcript reference sequence used is NM\_171825.2 (Küry et al., 2017; Study, 2017; Brown et al., 2021), NM\_015981.3 (Akita et al., 2018) for *CAMK2A*, NM\_172079.2 (Iossifov et al., 2014; Küry et al., 2017), NM\_001220.4 (Study, 2017; Akita et al., 2018) for *CAMK2B* and NM\_172171.2 (De Ligt et al., 2012), NM\_172169.2 (Study, 2017) for *CAMK2G*

<sup>c</sup>Protein reference sequence used is NP\_741960.1 (Küry et al., 2017; Study, 2017; Brown et al., 2021), NP\_057065.2 (Akita et al., 2018), Q9UQM7-2 (Chia et al., 2018) for CaMKII $\alpha$ , NP\_742076.1 (Iossifov et al., 2014; Küry et al., 2017), NP\_001211.3 (Study, 2017; Akita et al., 2018) for CaMKII $\beta$  and NP\_751911.1 (De Ligt et al., 2012), NP\_751909.1 (Study, 2017) for CaMKII $\gamma$

Abbreviations: AD-Alzheimer's Disease, DD-Developmental Disorder, ID-Intellectual Disability, MCI-Mild Cognitive Impairment, NDD-Neurodevelopmental Disorder, SCZ-Schizophrenia, SNP-Single Nucleotide Polymorphism
